# Supplementary material
Source: PubMed Central journal article supplement (PMC7444972)
Supplement: mmc1.pdf [file mmc1.pdf]

# THE LANCET Oncology

## Supplementary appendix

This appendix formed part of the original submission and has been peer reviewed. We post it as supplied by the authors.

Supplement to: Lee LYW, Cazier J-B, Starkey T, et al. COVID-19 prevalence and mortality in patients with cancer and the effect of primary tumour subtype and patient demographics: a prospective cohort study. *Lancet Oncol* 2020; published online Aug 24. [http://dx.doi.org/10.1016/S1470-2045\(20\)30442-3](http://dx.doi.org/10.1016/S1470-2045(20)30442-3).

## SUPPLEMENTARY METHODS

### Data Collection and analysis

Prospective data collection was performed by the pan-UK cancer centre emergency response network. Case reporting was led by a COVID-19 Emergency Response Reporting Individual (ERRI), supported by a Local Emergency Response Reporting Group (LERRG) at each centre. The UKCCMP encouraged all local reporting sites to enter data in a real time basis, as soon as a positive SARS-CoV-2 test had been identified. The data fields were then re-updated as soon as treatment and outcomes had been identified. The ERRI was a trained/training oncologist who did data review, annotation and entry. In a small number of centres, data entry was performed by data managers but with direct oversight by the ERRI. This secure EDC platform is hosted by the Institute of Translational Medicine at the University of Birmingham.

### Statistical analysis & Data visualisation

Analyses were performed in R version 3.6.3 utilising the `glm()` (family = binomial(link = "logit")) and `fisher.test()` functions, respectively. Data processing and visualisation utilised R (version 3.6.3) packages including broom, dplyr, forestplot, ggplot2, ggsci, pheatmap, RColorBrewer, robustbase and viridis. Data subsetting was performed using the `subset()` function of 'robustbase' and data reshaping for visualisation involved the use of the `tidy()` function of 'broom', and `group_by()` and `melt()` functions of 'dplyr'. Functions from the ggplot2 R package were used to generate multiple plots including barplots (`geom_bar`) and lineplots (`geom_line`). The `pheatmap()` and `forestplot()` functions of the 'pheatmap' and 'forestplot' R packages was also used to generate the heatmap and forest plots, respectively.

### Acknowledgements

We would like to thank all members of the UKCCMP reporting network and ERRIs for their hard work in contributing data at a challenging time:

Michael Aggie, Akinfemi Akingboye, Mohammed Alihilali, Angelos Angelakas, Vasileios Angelis, Iris Anil, Anne Armstrong, Sarah Ayers, Vartika Bisht, Kathryn Banfill, Craig Barrington, Jane Barrett, Mark Baxter, Ahmed Bedair, Sarah Benafif, James Best, Madhumita Bhattacharyya, Sean Brown, Victoria Brown, Clair Brunner, Emma Burke, Ruth Board, Rachel Bolton, Helen Bowyer, Hayley Boyce, Lauren Cammaert, Emma Cattell, Joseph Chacko, Julia Chackathayil, Olivia Chan, Neha Chopra, Mahbuba Choudhury, Ryan Claydon, Lucy Cook, Ellen Copson, Pippa Corrie, Stephanie Cornthwaite, Nicola Cox, Jamie D'Costa, Sarah Derby, Louise Devereaux, Yvette Drew, Caroline Dobeson, Saoirse Dolly, Leonie Eastlake, Shawn Ellis, Laura Feeney, Ana Ferreira, Claire Fuller, Myria Galazi, Abigail Gault, Aisha Ghaus, Duncan Gilbert, Robert Goldstein, Paul Greaves, Clare Griffin, Simon Grumett, Julia Hall, Peter Hall, Madeleine Hewish, Stephen Hibbs, Helen Hollis, Francesca Holt, Laura Horsley, Zoe Hudson, Christopher Jingree, Jack Illingworth, Rema Jyothirmayi, Sangary Kathirgamakarthiseyan, Bartłomiej Kurec, Amy Kwan, Sin Lau, Pauline Leonard, Sarah Lowndes, Annet Madhan, Samah Massalha, Alison Massey, Alec Maynard, Sophie McGrath, Agnieszka Michael, Ali Abdulnabi Suwaidan, Sam Moody, Leena Mukherjee, Daniel Muller, Piangfan Naksukpaiboon, Jilian Noble, Roderick Oakes, Paul Oats, Alicia Okines, Diego Ottaviani, Shefali Parikh, Alexander Pawsey, Ying Ying Peng, Yuriy Petrenko, Ruth Pettengell, Annet Pillai, Ashley Poon-King, Sian Pugh, Taslima Rabbi, Paul Ramage, Emily Renninon, Tim Robinson, Tom Roques, Michael Rowe, Joseph Sacco, Rebecca Sargent, Martin Scott-Brown, Christopher Scrase, Simon Shamas, Heather Shaw, Rachel Sharkey, Omar Sheikh, Rohan Shotton, Fiona Smith, Christopher Sng, Gehan Soosaipillai, Eliana Tacconi, Chrissie Thirlwell, Michael Tilby, Ann Tivey, Caroline Usbourne, Sophia Wong, Victoria Woodcock, Anjui Wu, Simon Wyatt, Nadia Yousaf.

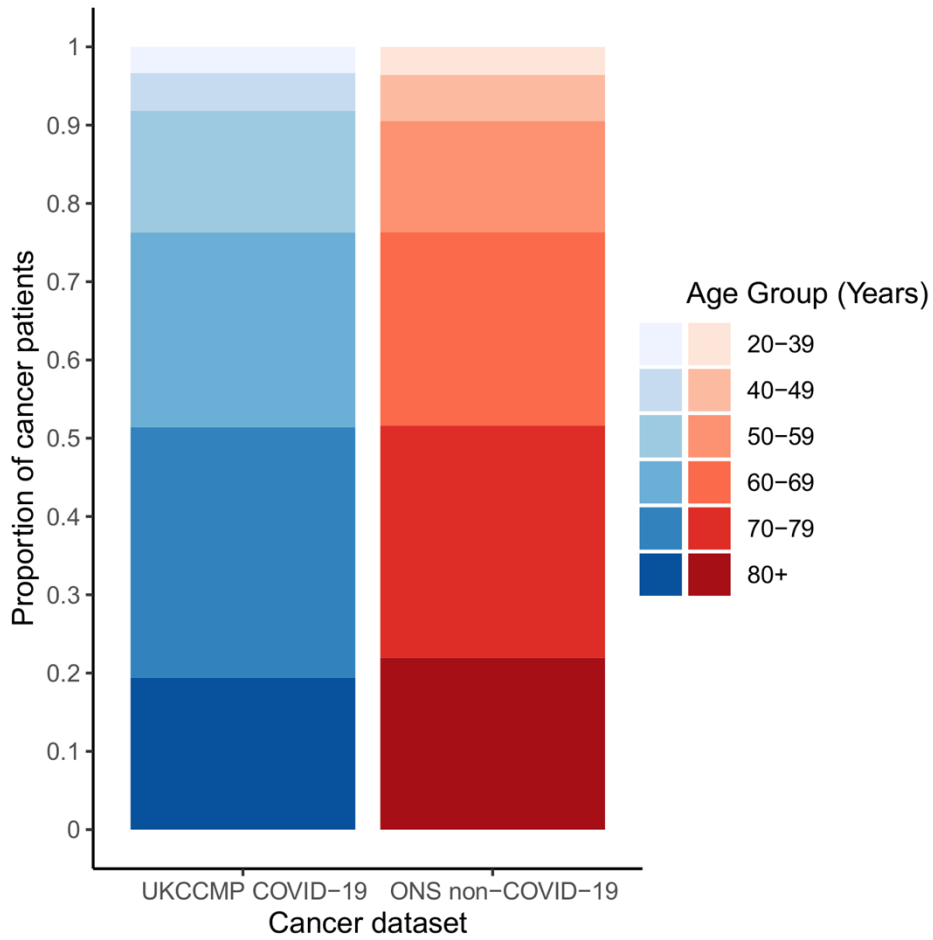

Supplementary Figure 1. Stacked bar chart showing age distribution of cancer patients in the UKCCMP who had contracted SARS-CoV-2 and ONS cancer control population.

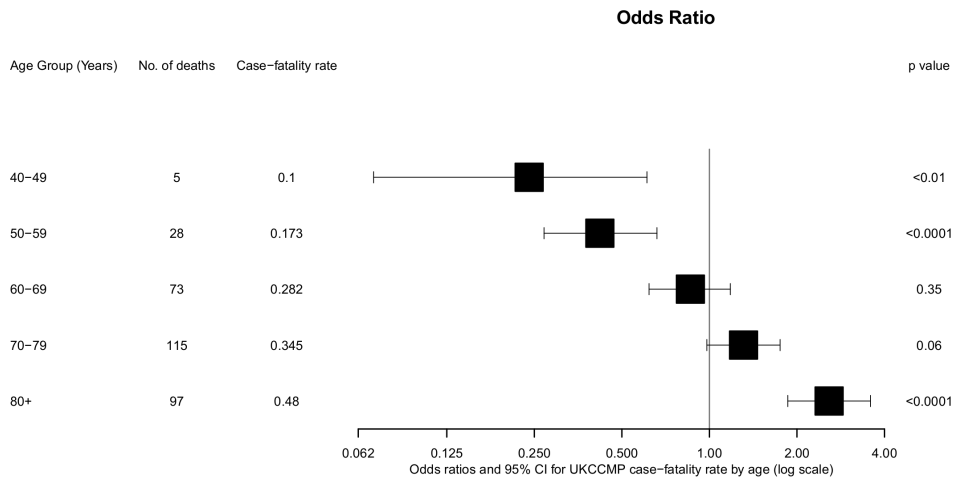

Supplementary Figure 2. Forest plot showing distribution of age groups of cancer patients who died in the UKCCMP and case fatality rates. Odds ratio are relative to the UK CCMP population.

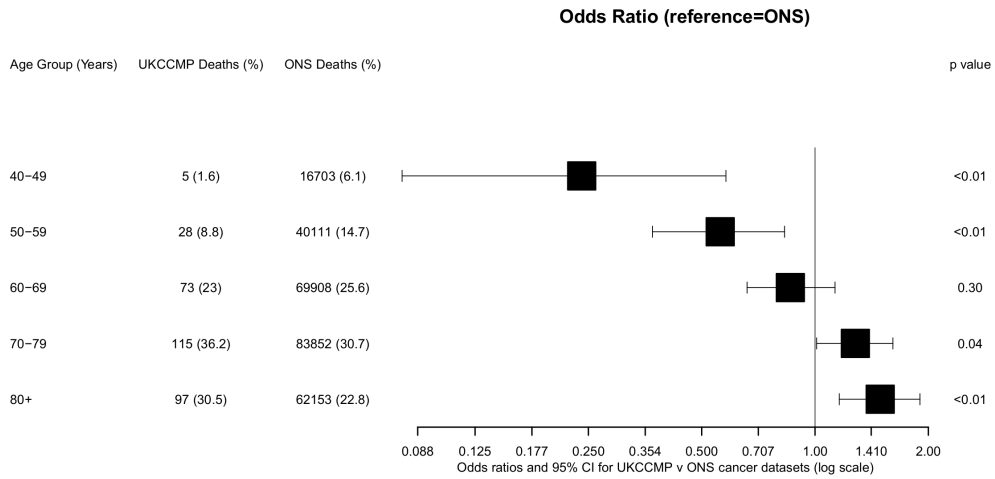

Supplementary Figure 3: Forest plot showing distribution of age groups of patients who died in the UKCCMP relative to the age distribution of the ONS cancer control population.

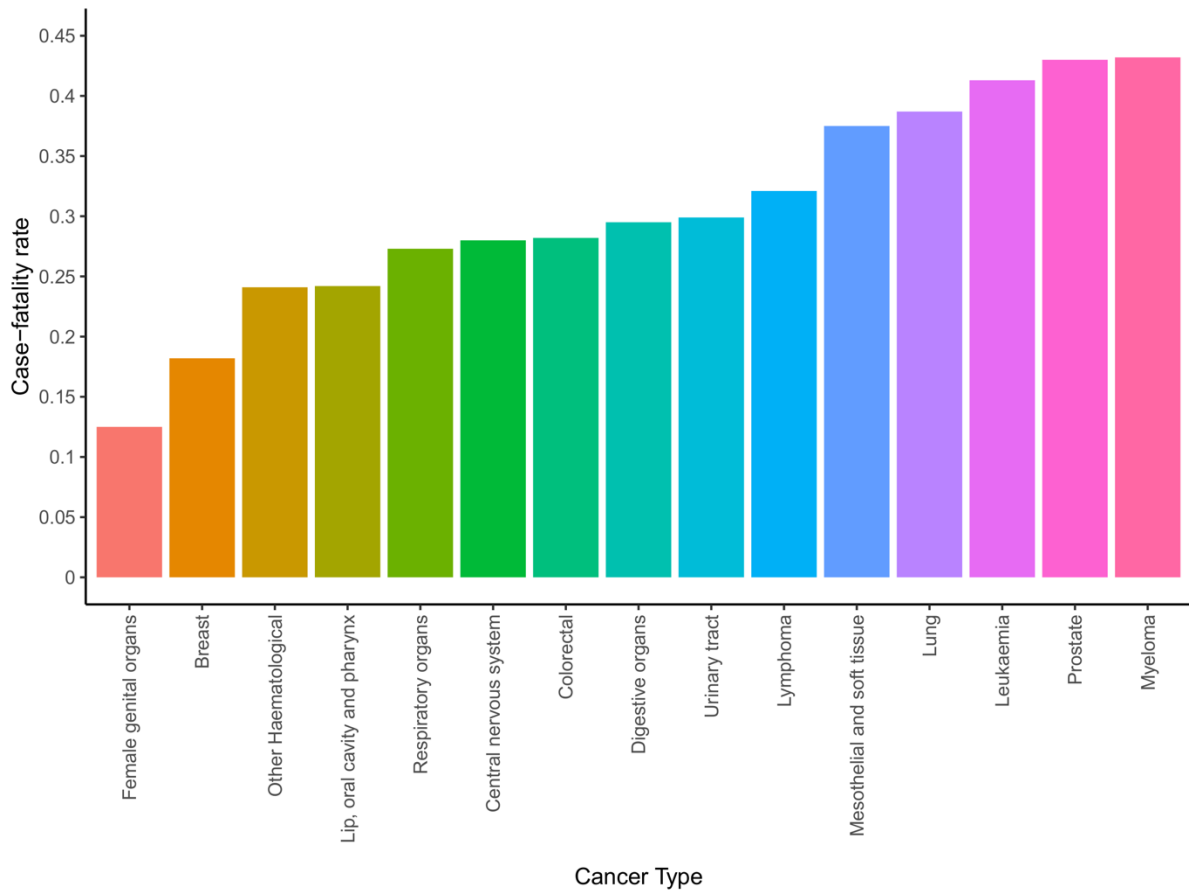

Supplementary Figure 4: Case fatality rate of patients following a presenting with COVID-19 in the UKCCMP cohort, assessed by tumour subtype.

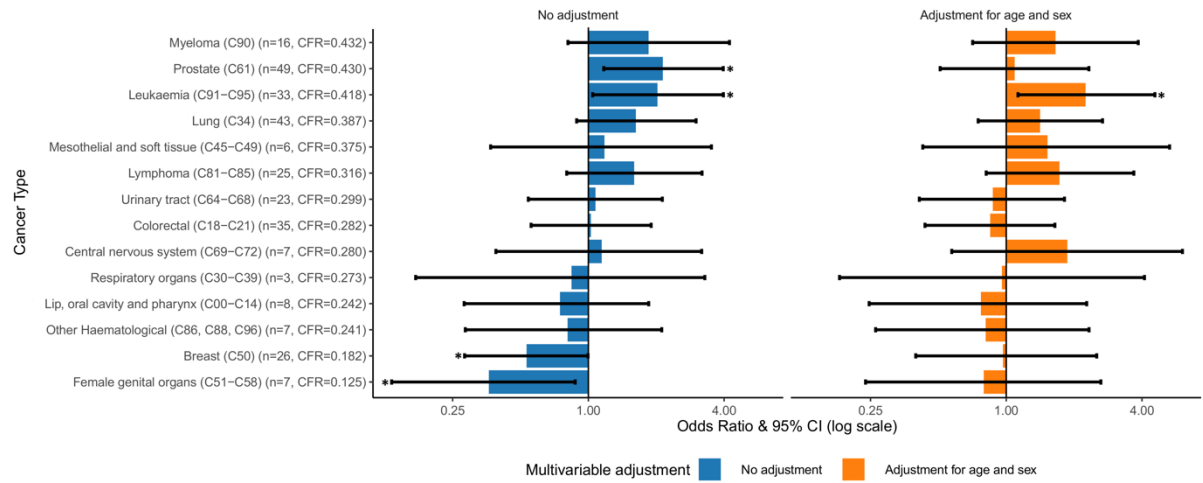

Supp Figure 5. Waterfall plot showing risk of death for each tumour subtype following COVID-19 compared to other subtypes (reference), before and after age and sex correction multivariable correction. \* denotes statistical significance of  $p$  adjusted, where \*  $p < 0.05$ .

|                                        | Haematological malignancies (n=227) | Non-haematological malignancies (n=817) | Univariate analysis  |         | Multivariable adjusted analysis |         |
|----------------------------------------|-------------------------------------|-----------------------------------------|----------------------|---------|---------------------------------|---------|
|                                        |                                     |                                         | Odds Ratio (CI)      | p value | Odds Ratio (CI)                 | p value |
| <b>Patient features</b>                |                                     |                                         |                      |         |                                 |         |
| - Male                                 | 148 (65.2%)                         | 447 (54.7%)                             | 1.53 (1.13-2.09)     | <0.01   | 1.58 (1.16-2.16)                | <0.01   |
| - Female                               | 79 (34.8%)                          | 366 (44.8%)                             |                      |         |                                 |         |
| - Other                                | 0 (0.0%)                            | 4 (0.5%)                                |                      |         |                                 |         |
| - Median age/years (std)               | 69 (14.16)                          | 70 (13.09)                              |                      | 0.03    |                                 |         |
| <b>Co-morbidities</b>                  |                                     |                                         |                      |         |                                 |         |
| - Cardiovascular disease               | 21 (9.3%)                           | 124 (15.2%)                             | 0.56 (0.34-0.91)     | 0.02    | 0.62 (0.36-1.01)                | 0.07    |
| - COPD                                 | 7 (3.1%)                            | 73 (8.9%)                               | 0.32 (0.13-0.66)     | <0.01   | 0.35 (0.14-0.72)                | <0.01   |
| - Diabetes                             | 33 (14.5%)                          | 145 (17.7%)                             | 0.79 (0.51-1.18)     | 0.26    | 0.78 (0.50-1.17)                | 0.24    |
| - Hypertension                         | 60 (26.4%)                          | 283 (34.6%)                             | 0.66 (0.47-0.92)     | 0.02    | 0.68 (0.47-0.97)                | 0.03    |
| - None                                 | 52 (22.9%)                          | 153 (18.7%)                             | 1.32 (0.91-1.90)     | 0.14    | 1.31 (0.87-1.96)                | 0.19    |
| - No data                              | 39 (17.2%)                          | 136 (16.6%)                             |                      |         |                                 |         |
| <b>Smoking status</b>                  |                                     |                                         |                      |         |                                 |         |
| - Current smoker                       | 7 (3.1%)                            | 38 (4.7%)                               | 0.99 (0.39-2.17)     | 0.98    | 0.77 (0.30-1.74)                | 0.56    |
| - Ex-smoker                            | 32 (14.1%)                          | 234 (28.6%)                             | 0.59 (0.37-0.94)     | 0.03    | 0.63 (0.38-1.03)                | 0.07    |
| - Never smoker                         | 52 (22.9%)                          | 218 (26.7%)                             | 1.66 (1.06-2.63)     | 0.03    | 1.67 (1.04-2.70)                | 0.04    |
| - No data                              | 136 (59.9%)                         | 327 (40.0%)                             |                      |         |                                 |         |
| <b>Patient outcome</b>                 |                                     |                                         |                      |         |                                 |         |
| - Death (all cause)                    | 82 (36.1%)                          | 237 (29.0%)                             | 1.61 (1.15-2.24)     | <0.01   | 1.74 (1.21-2.48)                | <0.01   |
| - Death (COVID-19)                     | 80 (35.2%)                          | 215 (26.3%)                             | 1.77 (1.27-2.48)     | <0.01   | 1.93 (1.35-2.77)                | <0.01   |
| - Death (Cancer)                       | 1 (0.4%)                            | 18 (2.2%)                               | 0.21 (0.01-1.02)     | 0.13    | 0.22 (0.01-1.06)                | 0.14    |
| - Death (other)                        | 1 (0.4%)                            | 4 (0.5%)                                | 0.96 (0.05-6.54)     | 0.97    | 1.12 (0.06-7.79)                | 0.92    |
| - Hospitalised                         | 5 (2.2%)                            | 36 (4.4%)                               | 0.52 (0.18-1.23)     | 0.178   | 0.53 (0.18-1.26)                | 0.19    |
| <b>Cancer treatment within 4 weeks</b> |                                     |                                         |                      |         |                                 |         |
| - Chemotherapy                         | 108 (47.6%)                         | 241 (29.5%)                             | 2.17 (1.60-2.93)     | <0.0001 | 2.15 (1.57-2.95)                | <0.0001 |
| - Immunotherapy                        | 0 (0.0%)                            | 39 (4.8%)                               | 0.00 (0.00-2.90E+07) | 0.98    | 0.00 (0.00-3.17E+07)            | 0.981   |
| - Radiotherapy                         | 2 (0.9%)                            | 84 (10.3%)                              | 0.08 (0.01-0.25)     | <0.01   | 0.07 (0.01-0.24)                | <0.01   |
| - Surgery                              | 0 (0.0%)                            | 36 (4.4%)                               | 0.00 (0.00-8.99E+07) | 0.98    | 0.00 (0.00-1.39E+08)            | 0.98    |
| - Targeted therapy                     | 26 (11.5%)                          | 65 (8.0%)                               | 1.49 (0.91-2.39)     | 0.10    | 1.45 (0.87-2.33)                | 0.134   |
| <b>COVID-19 Symptoms</b>               |                                     |                                         |                      |         |                                 |         |
| - Chills                               | 9 (4.0%)                            | 23 (2.8%)                               | 1.49 (0.64-3.16)     | 0.32    | 1.45 (0.62-3.11)                | 0.36    |
| - Coryzal symptoms                     | 13 (5.7%)                           | 47 (5.8%)                               | 1.04 (0.53-1.90)     | 0.91    | 1.03 (0.52-1.90)                | 0.93    |
| - Cough                                | 93 (41.0%)                          | 381 (46.6%)                             | 0.83 (0.60-1.14)     | 0.26    | 0.82 (0.59-1.13)                | 0.22    |
| - Diarrhoea                            | 26 (11.5%)                          | 63 (7.7%)                               | 1.63 (0.99-2.62)     | 0.05    | 1.67 (1.01-2.70)                | 0.04    |
| - Fatigue                              | 46 (20.3%)                          | 150 (18.4%)                             | 1.19 (0.81-1.73)     | 0.36    | 1.22 (0.83-1.77)                | 0.31    |
| - Fever                                | 133 (58.6%)                         | 450 (55.1%)                             | 1.34 (0.96-1.90)     | 0.09    | 1.26 (0.89-1.79)                | 0.19    |
| - Headache                             | 15 (6.6%)                           | 28 (3.4%)                               | 2.09 (1.07-3.94)     | 0.03    | 2.11 (1.07-4.00)                | 0.03    |
| - Myalgia                              | 18 (7.9%)                           | 60 (7.3%)                               | 1.13 (0.64-1.93)     | 0.65    | 1.15 (0.64-1.97)                | 0.62    |
| - Nausea and/or Vomiting               | 8 (3.5%)                            | 43 (5.3%)                               | 0.68 (0.29-1.40)     | 0.33    | 0.70 (0.30-1.45)                | 0.37    |
| - Shortness of breath                  | 84 (37.0%)                          | 324 (39.7%)                             | 0.95 (0.69-1.30)     | 0.73    | 0.92 (0.66-1.27)                | 0.61    |
| - Sore throat                          | 9 (4.0%)                            | 32 (3.9%)                               | 1.05 (0.47-2.16)     | 0.89    | 0.98 (0.43-2.04)                | 0.96    |
| - Asymptomatic                         | 5 (2.2%)                            | 39 (4.8%)                               | 0.47 (0.16-1.09)     | 0.11    | 0.50 (0.17-1.18)                | 0.15    |
| - No data                              | 35 (15.4%)                          | 99 (12.1%)                              |                      |         |                                 |         |
| <b>COVID-19 Severity Score</b>         |                                     |                                         |                      |         |                                 |         |
| - severe/critical                      | 119 (52.4%)                         | 339 (41.5%)                             | 1.53 (1.13-2.06)     | <0.01   | 1.57 (1.15-2.15)                | <0.01   |
| - mild                                 | 103 (45.4%)                         | 448 (54.8%)                             |                      |         |                                 |         |
| - No data                              | 5 (2.2%)                            | 30 (3.7%)                               |                      |         |                                 |         |
| <b>COVID-19 treatment</b>              |                                     |                                         |                      |         |                                 |         |
| - Antibiotics                          | 145 (63.9%)                         | 495 (60.6%)                             | 1.35 (0.93-2.00)     | 0.12    | 1.35 (0.92-2.00)                | 0.13    |
| - Fluids                               | 86 (37.9%)                          | 247 (30.2%)                             | 1.52 (1.10-2.11)     | 0.01    | 1.54 (1.10-2.14)                | 0.01    |
| - High Flow Oxygen (HFO)               | 29 (12.8%)                          | 61 (7.5%)                               | 1.89 (1.16-3.01)     | <0.01   | 1.82 (1.11-2.94)                | 0.02    |
| - ITU + Ventilation                    | 19 (8.4%)                           | 25 (3.1%)                               | 3.00 (1.60-5.57)     | <0.01   | 2.73 (1.43-5.11)                | <0.01   |
| - ITU - Ventilation                    | 7 (3.1%)                            | 12 (1.5%)                               | 2.19 (0.81-5.54)     | 0.10    | 2.16 (0.78-5.54)                | 0.12    |
| - Non-invasive Ventilation             | 19 (8.4%)                           | 35 (4.3%)                               | 2.11 (1.16-3.75)     | 0.01    | 2.10 (1.14-3.76)                | 0.01    |
| - Oxygen                               | 99 (43.6%)                          | 310 (37.9%)                             | 1.38 (1.00-1.90)     | 0.05    | 1.41 (1.01-1.96)                | 0.04    |
| - None                                 | 26 (11.5%)                          | 134 (16.4%)                             | 0.67 (0.42-1.04)     | 0.08    | 0.65 (0.41-1.02)                | 0.07    |
| - No data                              | 40 (17.6%)                          | 128 (15.7%)                             |                      |         |                                 |         |

Supp. Table 1: Univariate and multivariate analyses of differences in patient demographics/symptoms/cancer treatments and clinical course of haematological vs. non-haematological malignancies. Univariate analysis was conducted with presence compared to absence (reference for each category) in haematological malignancies vs. non-haematological malignancies. Multivariate analyses were conducted corrected for patient age and sex.
